# Supplementary material for: EFR-Mediated Innate Immune Response in Arabidopsis thaliana is a Useful Tool for Identification of Novel ERQC Modulators
Source: MDPI journal article supplement (doi:10.3390/genes10010015), 2018-12-27
Supplement: s1 [file s1]

## Supplementary information

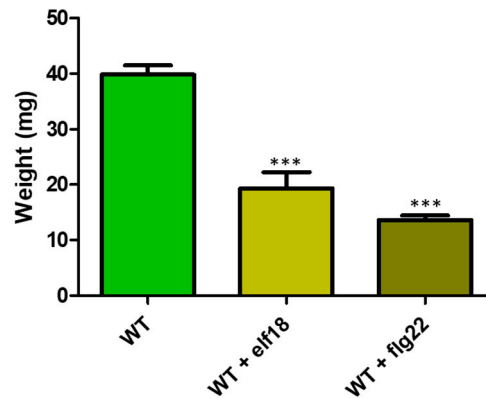

**Supplementary Figure 1. Effects of elicitors treatment on *At Col0*.** 13-days-old seedlings control or treated with 100 nM elf18 or flg22 elicitors. Values represent the mean of the plants fresh-weight (expressed in mg) of at least three independent experiments ( $\pm$  s.e.  $n=10$ ). Statistical analysis was determined by ANOVA with Bonferroni's test (\*= $P<0.5$ , \*\*= $P<0.01$ , \*\*\*= $P<0.001$ ).

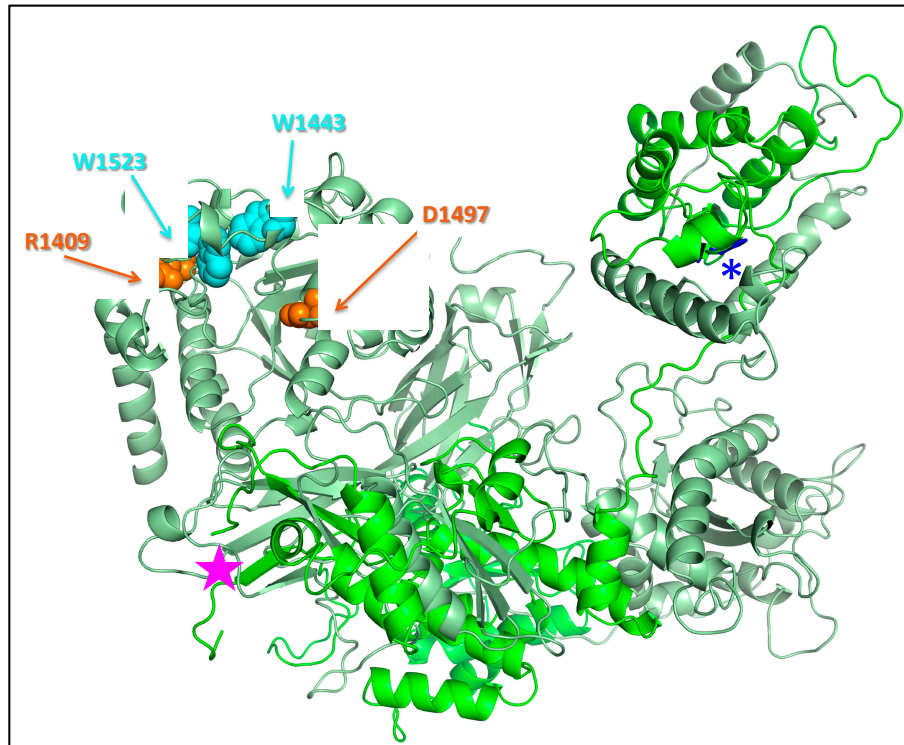

**Supplementary Figure 2. Mapping of *At* UGGT mutants on a homology model.** The portion of *At* UGGT preceding the site of the *psl2-5*  $\Delta 604-1613$  deletion mutant is in bright green; in grey/green the portion of *At* UGGT that is missing in the same *psl2-5* mutant. In cyan spheres, the sites of the premature stop mutations (*uggt3*: W1523stop and *psl2-4*: W1443stop); in orange spheres, the missense mutants (*psl2-3*: R1409K and *psl2-1*: D1497N). The purple star marks the missing loop containing the site of the *psl2-2* E306K mutation. The blue asterisk marks the site of the T-DNA insertion in the *uggt1-1* mutant whose response to elicitors was characterised in this study.

**Supplementary Table 1.** Primers used in the qRT-PCR analysis showed in this work.

| GENE          | AG CODE   | FORWARD PRIMER (5'-3') | REVERSE PRIMER (5'-3') |
|---------------|-----------|------------------------|------------------------|
| <i>UBQ5</i>   | AT3G62250 | GGAATCGACGCTTCATCTCG   | ATGAAAGTCCCAGCTCCACA   |
| <i>PHI1</i>   | AT1G35140 | TTGGTTTAGACGGGATGGTG   | ACTCCAGTACAAGCCGATCC   |
| <i>RET-OX</i> | AT1G26380 | AGGTTCTCGAACCCTAACAACA | GCACAGACGACACGTAAGAAAG |

**Supplementary Table 2.** Known *At* ER  $\alpha$ -Glu II mutants.

| Mutant name | Kind of mutation | Was it tested for elf18 response? | References |
|-------------|------------------|-----------------------------------|------------|
| psl5-1      | S517F            | Yes                               | [28]       |
| rsw3        | S599F            | Yes                               |            |
| psl4-1      | T-DNA insertion  | Yes                               |            |
| psl4-2      | W360stop         | Yes                               |            |

**Supplementary Table 3.** Known *At* UGGT mutants.

| Name of mutant | Kind of mutation                           | Was it tested for elf18 response? | References |
|----------------|--------------------------------------------|-----------------------------------|------------|
| uggt1          | Aberrant mRNA splicing variant             | No                                | [8]        |
| uggt2          | Aberrant mRNA splicing variant             | No                                |            |
| uggt3          | W1523stop                                  | Yes                               |            |
| uggt4          | T-DNA insertion in 16 <sup>th</sup> exon   | Yes                               |            |
| uggt1-1        | T-DNA insertion in 11 <sup>th</sup> exon   | No                                | [10]       |
| uggt1-2        | T-DNA insertion in 24 <sup>th</sup> intron | No                                |            |
| psl2-1         | D1497N                                     | Yes                               | [9]        |
| psl2-2         | E306K                                      | No                                |            |
| psl2-3         | R1409K, W1443stop                          | No                                |            |
| psl2-4         | W1443stop                                  | No                                |            |
| psl2-5         | Δ604-1613                                  | No                                |            |
